# Supplementary material
Source: Springer Nature journal article supplement (https://www.springermedizin.de/resource/supplementary/12985_2014_2417_MOESM3_ESM.pdf/9607054)

# CEF cells

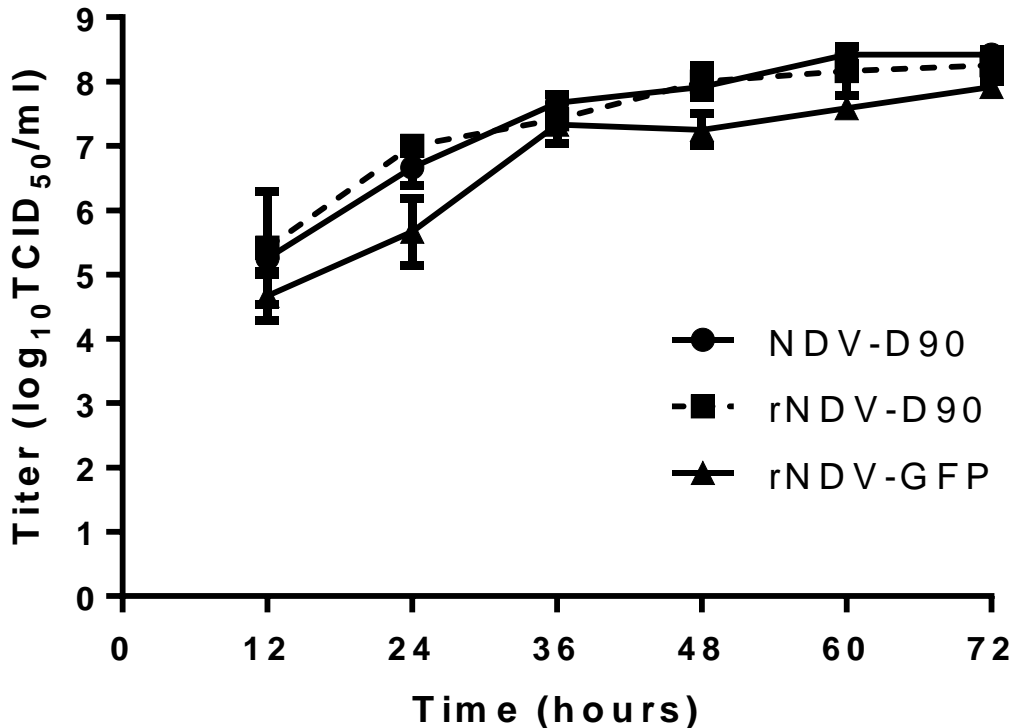

Supplement: MOESM3 [file 9607054]
